# Supplementary material
Source: PubMed Central journal article supplement (PMC11029635)
Supplement: 262_2013_1405_MOESM1_ESM.pdf [file 262_2013_1405_MOESM1_ESM.pdf]

**Table S1. Patient characteristics**

| <b>Age (years)</b> | <b>Total # Vaccines</b> | <b>Peak BLyS (pg/ml)</b> | <b>Peak PEPvIII Titer (1/log)</b> |
|--------------------|-------------------------|--------------------------|-----------------------------------|
| 49                 | 6                       | 986                      | 25,600                            |
| 62                 | 12                      | 2668                     | 819,200                           |
| 66                 | 10                      | 2136                     | 819,200                           |
| 56                 | 20                      | 1896                     | 256,000                           |
| 59                 | 14                      | 2293                     | 1,024,000                         |
| 61                 | 13                      | 3404                     | 2,048,000                         |
| 64                 | 10                      | 1201                     | 102,400                           |
| 56                 | 14+                     | 875                      | 512,000                           |

Abbreviations: BlyS=B lymphocyte Stimulating factor
